# Supplementary material
Source: Springer Nature journal article supplement (https://www.springermedizin.de/resource/supplementary/13024_2011_227_MOESM6_ESM.pdf/9643712)
Supplement: MOESM6 [file 9643712]

Table 2

Correlations between baseline CSF levels of soluble TNF receptors and TACE activity.

|          | CSF    | TACE            | sTNFR1          | sTNFR2          |
|----------|--------|-----------------|-----------------|-----------------|
| Controls | sTNFR1 | $r_s = 0.491^b$ | /               | $r_s = 0.567^c$ |
|          | sTNFR2 | $r_s = 0.557^c$ | $r_s = 0.567^c$ | /               |
| MCI      | sTNFR1 | $r_s = 0.400^c$ | /               | $r_s = 0.690^a$ |
|          | sTNFR2 | $r_s = 0.311^b$ | $r_s = 0.690^a$ | /               |
| AD       | sTNFR1 | $r_s = 0.541^c$ | /               | $r_s = 0.663^a$ |
|          | sTNFR2 | $r_s = 0.508^c$ | $r_s = 0.663^a$ | /               |

All data were collected at baseline. Abbreviations: CSF, cerebrospinal fluid; sTNFR, soluble tumor necrosis factor- $\alpha$  receptor; AD: Alzheimer's disease; MCI: mild cognitive impairment; TACE: tumor necrosis factor- $\alpha$  converting enzyme.

<sup>a</sup>  $p < 0.001$ .

<sup>b</sup>  $p < 0.05$ .

<sup>c</sup>  $p < 0.01$ .
